# Supplementary material
Source: PubMed Central journal article supplement (PMC6283660)
Supplement: IMM-156-86-s001.pdf [file IMM-156-86-s001.pdf]

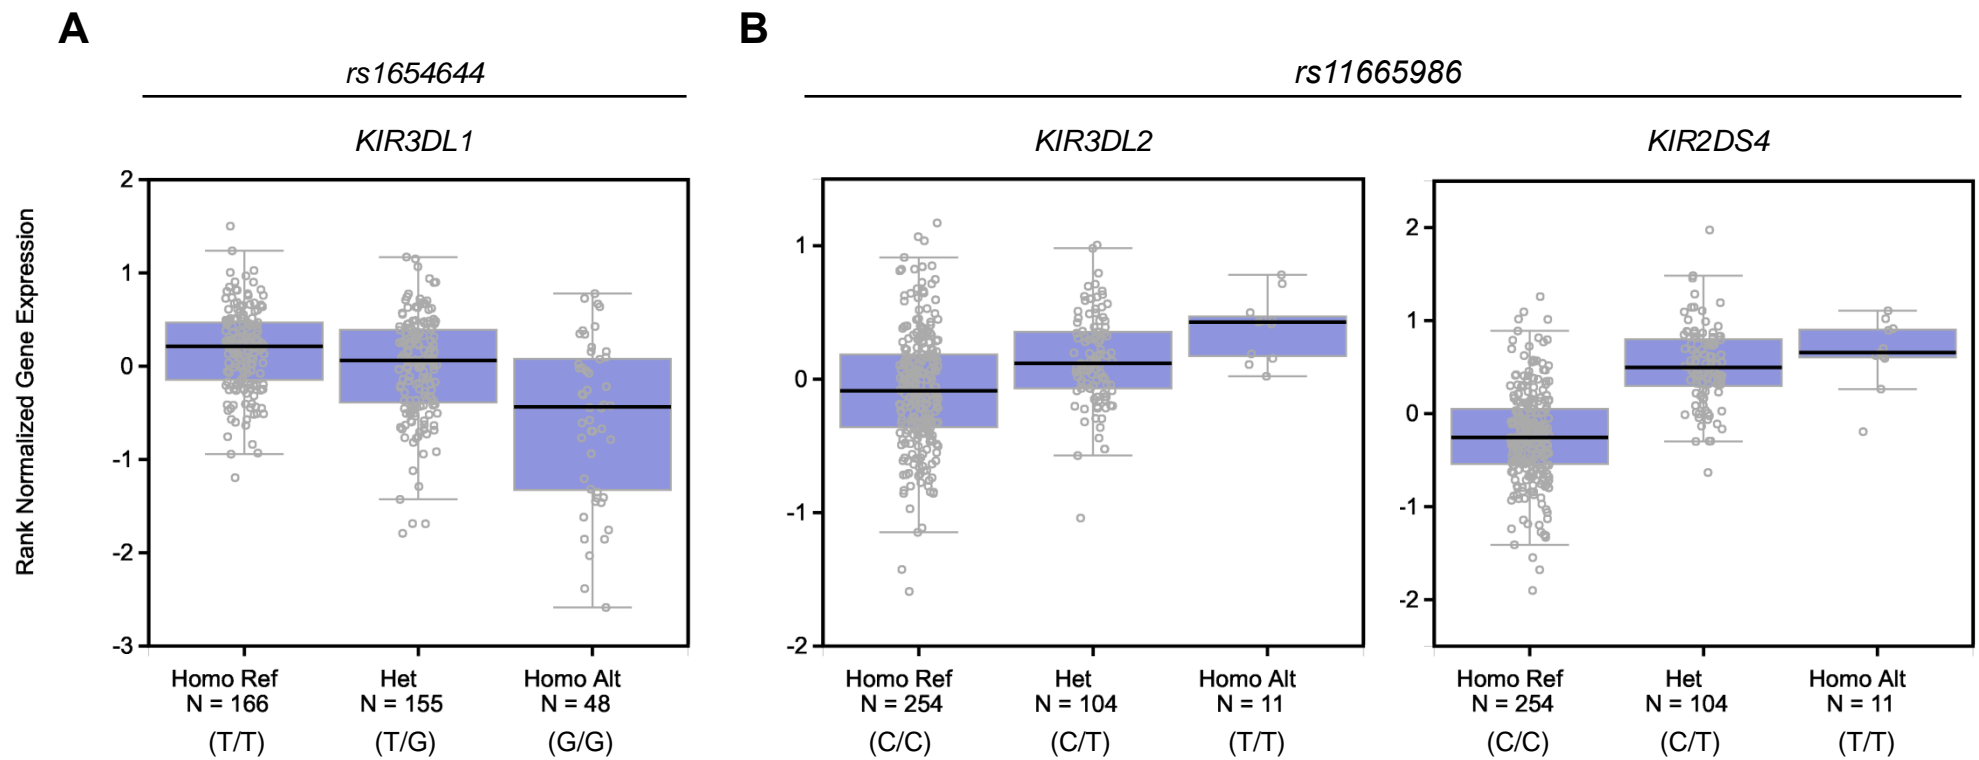

Supplemental Figure S1: The expression quantitative trait (eQTL) effect of haplotype 3 SNPs on KIR (killer-cell immunoglobulin like receptor) genes expression in whole blood. The eQTL effect of *rs1654644* genotypes on *KIR3DL1* (A), and (B) of *rs11665986* genotypes on *KIR3DL2* and *KIR2DS4* genes expression. Adapted from GTEx Portal.<sup>35</sup> Accessed on March 2018.
